# Supplementary material
Source: PubMed Central journal article supplement (PMC5490471)
Supplement: supp_2012.073601_2012_073601-Contributions.pdf [file supp_2012.073601_2012_073601-Contributions.pdf]

**Manuscript no. HAEMATOL/2012/073601 entitled “Large inter-individual variation of the pharmacodynamic effect of anticoagulant drugs on thrombin generation“**

**Authors: Saartje Bloemen, H. Coenraad Hemker, Raed Al Dieri**

**Information about the contributions of each person named as having participated in the study**

**1) Guarantor(s), i.e., person(s) who is (are) responsible for the integrity of the work as a whole:**

- Raed Al Dieri, Synapse BV and Department of Biochemistry, CARIM, Maastricht University, the Netherlands. r.aldieri@thrombin.com

According to the International Committee of Medical Journal Editors (ICMJE)

([http://www.icmje.org/ethical\\_1author.html](http://www.icmje.org/ethical_1author.html)): “*Authorship credit should be based on: 1) substantial contributions to conception and design, acquisition of data, or analysis and interpretation of data; 2) drafting the article or revising it critically for important intellectual content; and 3) final approval of the version to be published. Authors should meet conditions 1, 2, and 3 ..... Acquisition of funding, collection of data, or general supervision of the research group alone does not constitute authorship*”.

**The guarantors of this manuscript confirm that all persons designated as authors qualify for authorship, and that each author has participated sufficiently in the work to take public responsibility for appropriate portions of the content.**

**2) Authors who participated in the conception of the study: Saartje Bloemen, Raed Al Dieri, H. Coenraad Hemker**

**3) Design & Methods. The following authors were responsible for specific investigations:**

- Saartje Bloemen was responsible for performing the experiments
- Saartje Bloemen, H. Coenraad Hemker and Raed Al Dieri were responsible for performing the data analysis

**4) Results. The following authors were responsible for specific portions of the results, including figures and tables:**

- Saartje Bloemen, H. Coenraad Hemker and Raed Al Dieri were responsible for writing the results section and revising the tables and figures
- Saartje Bloemen was responsible for figure 1 and table1-3
- H. Coenraad Hemker was responsible for figure 2

**5) Writing the manuscript. The following authors were responsible for writing the manuscript:**

- Saartje Bloemen, H. Coenraad Hemker and Raed Al Dieri were responsible for writing the manuscript

**6) Contributors Listed in Acknowledgments: Bas de Laat read the manuscript and provided comments. Leonie Pelkmans provided technical assistance**
